# Supplementary material for: Detection of subclonal L1 transductions in colorectal cancer by long-distance inverse-PCR and Nanopore sequencing
Source: PubMed Central journal article supplement (PMC5673974; doi:10.1038/s41598-017-15076-3), 2017-11-06
Supplement: 41598_2017_15076_MOESM1_ESM.pdf [file 41598_2017_15076_MOESM1_ESM.pdf]

## SUPPLEMENTARY INFORMATION:

### Detection of subclonal L1 transductions in colorectal cancer by long-distance inverse-PCR and Nanopore sequencing

Barun Pradhan<sup>1,2†</sup>, Tatiana Cajuso<sup>1,3†</sup>, Riku Katainen<sup>1,3</sup>, Päivi Sulo<sup>1,3</sup>, Tomas Tanskanen<sup>1,3</sup>, Outi Kilpivaara<sup>1,3</sup>, Esa Pitkänen<sup>1,3</sup>, Lauri A. Aaltonen<sup>1,3,4</sup>, Liisa Kauppi<sup>1,2\*</sup> and Kimmo Palin<sup>1,3\*</sup>.

**Supplementary table S1:** Primers used for LDI-PCR

| Primer Pair | Primer name  | Sequence (5'-3')           | Location                |
|-------------|--------------|----------------------------|-------------------------|
| 1           | L1_001 (rev) | TTCACCTAAGCATGTATGTGGAAAAC | chr22:29065758-29065782 |
|             | L1_002 (fwd) | CCCAAATATACCCAATTACTGGCA   | chr22:29065833-29065857 |
| 2           | L1_048 (rev) | CAGTCACCTTTATTAGACATGTGG   | chr22:29065330-29065353 |
|             | L1_049 (fwd) | TCCAGAAGTGTGACCAGTTAG      | chr22:29065405-29065426 |
| 3           | L1_053 (rev) | TCTATGGCCATTTTATGGAATGAC   | chr22:29066009-29066032 |
|             | L1_054 (fwd) | GCCAGATCAAGTAATCCTACTCAT   | chr22:29066035-29066058 |

**Supplementary table S2:** Polyadq<sup>1</sup> strength scores of the polyadenylation signals of LINE-1 element in *TTC28* (#1) and subsequent following signals. The number in the first column refers to the polyadenylation signals depicted in **Figure 1b** and **Figure 4** with red lollipops.

| S. No. | Polyadenylation signals | Location       | Score | Prediction |
|--------|-------------------------|----------------|-------|------------|
| 1      | AATAAA                  | Chr22:29065288 | 0.009 | -          |
| 2      | AATAAA                  | Chr22:29065340 | 0.219 | -          |
| 3      | AATAAA                  | Chr22:29065433 | 0.112 | -          |
| 4      | ATTAAA                  | Chr22:29065481 | 0.000 | -          |
| 5      | ATTAAA                  | Chr22:29065643 | 0.003 | -          |
| 6      | ATTAAA                  | Chr22:29065870 | 0.895 | -          |
| 7      | ATTAAA                  | Chr22:29065907 | 0.049 | -          |
| 8      | AATAAA                  | Chr22:29066078 | 0.282 | +          |
| 9      | AATAAA                  | Chr22:29066099 | 0.400 | +          |

**Supplementary table S3:** Summary of characteristics of the insertions detected by local assembly of the paired-end read data in c985T. The length of missing sequence was estimated from genomic coordinates detected at the junctions of the insertions. TSM = Target-site modification; del. = deletion; dup. = duplication

| Target co-ordinates |             | Contigs | Insertion co-ordinates (start-end)    | TSM  | TSM (bp) | Missed sequence (bp) |
|---------------------|-------------|---------|---------------------------------------|------|----------|----------------------|
| 5' junction         | 3' junction |         |                                       |      |          |                      |
| 1:195769724         | 1:195769735 | 1       | 29065822-29066119                     | del. | 10       | 0                    |
| 4:93280482          | 4:93280483  | 1       | 29065653-29065889                     | no   | -        | 0                    |
| 4:155900401         | 4:155900410 | 2       | 29064889-29065912                     | del. | 8        | 614                  |
| 4:183051382         | 4:183051401 | 1       | 29065306-29065455                     | del. | 18       | 0                    |
| 7:146783241         | 7:146783223 | 2       | 29065372-29065909                     | dup. | 18       | 88                   |
| 7:152661937         | 7:152661940 | 2       | 29065691-29065889 & 29065510-29065295 | del. | 2        | N/A                  |
| 12:33708290         | 12:33708277 | 1       | 29065722-29066118                     | dup. | 14       | 0                    |

**Supplementary table S4:** Hash lengths used in the local assembly of the paired-end read data. All hash lengths within default parameters (11,13,15,17,19,21,23,25,27,29,31) were tested and the hash length that produced the longest and most contiguous contig was selected for each insertion (insertion length= 400, coverage cut off= 2 and expected coverage =10).

| chr | Predicted breakpoint | Hash length |
|-----|----------------------|-------------|
| 4   | 93280483             | 25          |
| 4   | 155900402            | 11          |
| 7   | 146783222            | 23          |
| 12  | 33708276             | 15          |
| 1   | 195769725            | 23          |
| 4   | 183051400            | 21          |
| 7   | 152661939            | 19          |
| 15  | 97602708             | 23          |

**Supplementary table S5:** Restriction fragment length made by all three restriction enzymes used in native (unique tag of *TTC28 L1*) as well as target regions predicted by WGS analysis. Highlighted in grey predicted fragments longer than 15 kb and therefore less likely to be amplified.

| Name of the sample      | Location of the native and targets | Restriction fragment length (in base pairs) |                      |                      |
|-------------------------|------------------------------------|---------------------------------------------|----------------------|----------------------|
|                         |                                    | <i>SacI</i> (GAGCTC)                        | <i>PstI</i> (CTGCAG) | <i>NsiI</i> (ATGCAT) |
| Present in all (Native) | chr22:29065288-29066104            | 5699                                        | 6344                 | 10288                |
| c985                    | chr1:195769724-195769735           | >15kb                                       | 4990                 | 817                  |
|                         | chr4:93280482-932804483            | 6870                                        | 9481                 | 747                  |
|                         | chr4:155900401-155900410           | >15kb                                       | 4080                 | 2112                 |
|                         | chr4:183051382-183051401           | 3676                                        | >15kb                | 5122                 |
|                         | chr7:146783223-146783241           | 2276                                        | 5147                 | 4503                 |
|                         | chr7:152661937-152661940           | 10974                                       | 1405                 | >15kb                |
|                         | chr12:33708277-33708290            | 4013                                        | 5041                 | 8010                 |
|                         | chr15:97602700-97604688            | >15kb                                       | 8828                 | 8141                 |
| c368                    | chr1:115147190-115147209           | 11400                                       | 3093                 | 7461                 |
|                         | chr2:182004550-182004552           | >15kb                                       | 1418                 | 3683                 |
|                         | chr2:229159060-229159060           | >15kb                                       | 7085                 | 7374                 |
|                         | chr6:70787198-70787200             | 3673                                        | 1493                 | 9563                 |
|                         | chr6:133527432-133527432           | >15kb                                       | 7436                 | 6813                 |
|                         | chr21:10015974-10015974            | >15kb                                       | 7039                 | 3986                 |

**Supplementary table S6:** Primers used for validation of novel L1 insertions detected by LDI-PCR/Nanopore sequencing in colorectal cancer samples c985T and c368T.

| Primer name   | Sequence (5'-3')         | Approach            |
|---------------|--------------------------|---------------------|
| 16_26220797_F | TTCAAAGAGATATCTGCACTCCA  | Nanopore validation |
| 4_90987145_F  | CTGTGTCATGGGACCAACAG     | Nanopore validation |
| 16_5902154_F  | GAGCATTCTTCCTGCTGTC      | Nanopore validation |
| 14_99070526_F | TGGAGCCTATGACCTTCTGTG    | Nanopore validation |
| 3_99147137_F  | GGGCCAAACTCAGAATTTCA     | Nanopore validation |
| 6_74978246_F  | TCAATGGGGCATATCACAGA     | Nanopore validation |
| 8_111856478_F | TGTCGCTATGGAATAATTTAGATG | Nanopore validation |
| 2_78612546_F  | TTTCAAGCTTATTACCAATCC    | Nanopore validation |
| Y_15633117_F  | CTTCAGGCCCTGTCTGACTC     | Nanopore validation |
| 8_114925191_F | TCAACATTCATACTTGTGGCATA  | Nanopore validation |
| 7_152870678_F | TTGAGGGATTTGTGATTGAGG    | Nanopore validation |

|                |                             |                     |
|----------------|-----------------------------|---------------------|
| 5_8665942_F    | TGTGGTTATTTCCCCAGCTC        | Nanopore validation |
| 12_33100097_F  | GATAAGAGGTCGGCACAAGG        | Nanopore validation |
| 2_129889240_F  | TGTTTTGTTATTTGGAAAAGTAGGTG  | Nanopore validation |
| 14_79638933_F  | CCTCTGCATAGGGAGCAAAC        | Nanopore validation |
| 18_1233989_F   | TGTTTCCAGGAGTTTGTCCA        | Nanopore validation |
| 2_50947605_F   | CATTTTCAGCCTGCACAAGA        | Nanopore validation |
| 10_107557376_F | AAGAAGCTACAAGCCCCTGA        | Nanopore validation |
| 5_83347384_F   | AGACCTCCAGCAAACCTCAA        | Nanopore validation |
| 6_112763084_F  | TCCATCTCTTCCCTCAGT          | Nanopore validation |
| 10_101386662_F | TCTTCCTGAAAAAGCCGTTG        | Nanopore validation |
| 8_107979184_F  | TCAAAACAAAACTCCAGTCCA       | Nanopore validation |
| 5_119565859_F  | CCTAGAGTGCATTGGCCTGT        | Nanopore validation |
| X_108351907_F  | CCTGGGGCAACTCAATCTT         | Nanopore validation |
| 16_26220797_R  | AGCACCCACTGCTGATCATT        | Nanopore validation |
| 4_90987145_R   | CCAGCTCCCATAGATTTGGA        | Nanopore validation |
| 16_5902154_R   | CAAGCATTGGTTGATCAGGA        | Nanopore validation |
| 14_99070526_R  | ACCTCGCCATTGTAATGCTC        | Nanopore validation |
| 3_99147137_R   | CACTCTTTTCTGTGCCAATG        | Nanopore validation |
| 6_74978246_R   | GGTGCATCTTCAAATGCTGA        | Nanopore validation |
| 8_111856478_R  | CCTTCAATATTGCTCTTTGC        | Nanopore validation |
| 2_78612546_R   | GGTAGCCACTTGAATAATTGG       | Nanopore validation |
| Y_15633117_R   | CAGAGCTGTGATCCACTCCA        | Nanopore validation |
| 8_114925191_R  | TGCCTTGATCCAGACTTTTTTC      | Nanopore validation |
| 7_152870678_R  | TAAATGGCCAGAGCAGGAAG        | Nanopore validation |
| 5_8665942_R    | TTGCCTAAAGCCTCAAAGTTTC      | Nanopore validation |
| 12_33100097_R  | GATAAGAGGTCGGCACAAGG        | Nanopore validation |
| 2_129889240_R  | GCACACAGTAATTTCTTTTCAGC     | Nanopore validation |
| 14_79638933_R  | TGTGATAACAGCTTTGGAAGTGA     | Nanopore validation |
| 18_1233989_R   | CACAAATCACTGAGGCAGAAA       | Nanopore validation |
| 2_50947605_R   | TGCAGCAAGGAAGGAGAGTT        | Nanopore validation |
| 10_107557376_R | TGAGCCACAAGTGTCTGACC        | Nanopore validation |
| 5_83347384_R   | TTTCTCTCTGGCTGCCCTTA        | Nanopore validation |
| 6_112763084_R  | TCTTCAGAACCACCCAGAGA        | Nanopore validation |
| 10_101386662_R | CTGTGCGCTAGGCTGGAGT         | Nanopore validation |
| 8_107979184_R  | AATGACCCAGCCTCTTCAGT        | Nanopore validation |
| 5_119565859_R  | TCCACAAATCAAATGCAACAA       | Nanopore validation |
| X_108351907_R  | CTTCCTGATCCCTCTGCTTG        | Nanopore validation |
| 1_195769715_F  | CCAAACATGTAGTAGTCTTGATTTGTA | Positive control    |
| 1_195769715_R  | AAAAATTC AAGCATATGGAAAA     | Positive control    |
| 15_97602708_F  | ttccagaccctcctTTA           | Allele-specific PCR |
| 15_97602708_R  | GGCAGCTTCATGTTGACACA        | Allele-specific PCR |
| Y_15633103_F   | GGCCATTTTATGGAATGACAA       | Allele-specific PCR |
| Y_15633103_R   | TTTTCAATTTTGTGGTTTTTCAA     | Allele-specific PCR |

|               |                            |                     |
|---------------|----------------------------|---------------------|
| 8_114925178_F | ACTGAGAATGATGGTTTCCAA      | Allele-specific PCR |
| 8_114925178_R | GAGCTCAGTTAGCATTGCACA      | Allele-specific PCR |
| 7_152870685_F | TAGATAAGAACGTTTTTGTGAATAAA | Allele-specific PCR |
| 7_152870685_R | ATCCACCCCATCATCCAAT        | Allele-specific PCR |
| 5_8665942_F   | ATAACAGCCCCAAGCAACAG       | Allele-specific PCR |
| 5_8665942_R   | GGCCATTTTATGGAATGACAA      | Allele-specific PCR |
| 12_33100084_F | TGCTTGCATTAAAAATGTTAAGTT   | Allele-specific PCR |
| 12_33100084_R | CATTCTTTTGAACACCTTTGAATC   | Allele-specific PCR |
| 16_26220798_F | GGGCTGGGTAGATGTTGGTT       | Allele-specific PCR |
| 16_26220798_R | GGATTACTTGATCTGGCCATCTA    | Allele-specific PCR |
| 4_90987149_F  | TCTTTTCTTCTTTTCTCACAGTAAAT | Allele-specific PCR |
| 4_90987149_R  | TTTTGGCCCTAACTGGTCAC       | Allele-specific PCR |
| 16_5902158_F  | GCCAGTAATTGGGTATATTTTGG    | Allele-specific PCR |
| 16_5902158_R  | GCATTTGAGGCAGAGGAGAC       | Allele-specific PCR |
| 14_99070523_F | CATTTTTAATGCAAGCATATTAACC  | Allele-specific PCR |
| 14_99070523_R | AAGCTCTCCCTTTCTGCGTA       | Allele-specific PCR |
| 3_99147111_F  | GGCAAATAATCTCATAAGCACA     | Allele-specific PCR |
| 3_99147111_R  | GCAGTGGGTGGTGATAGGAG       | Allele-specific PCR |

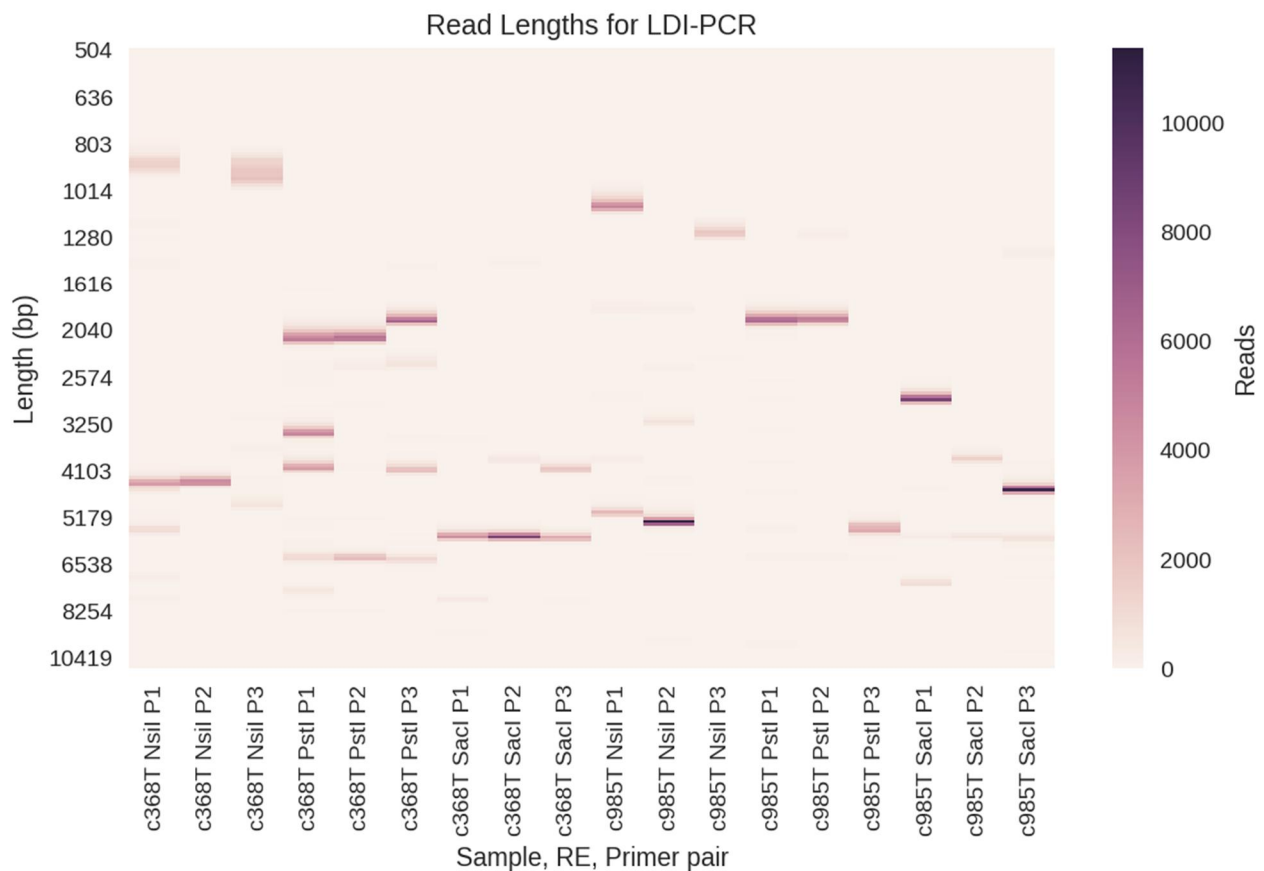

**Supplementary figure S1:** Read length histogram of LDI-PCR reads, Y-axis is split uniformly in log space to 200 histogram bins and bins are colored according to gradient. Read counts corresponding each sample, restriction enzyme and PCR primer pair are plotted separately. (Visualisation inspired by David Eccles <https://github.com/gringer/bioinfscripts> )

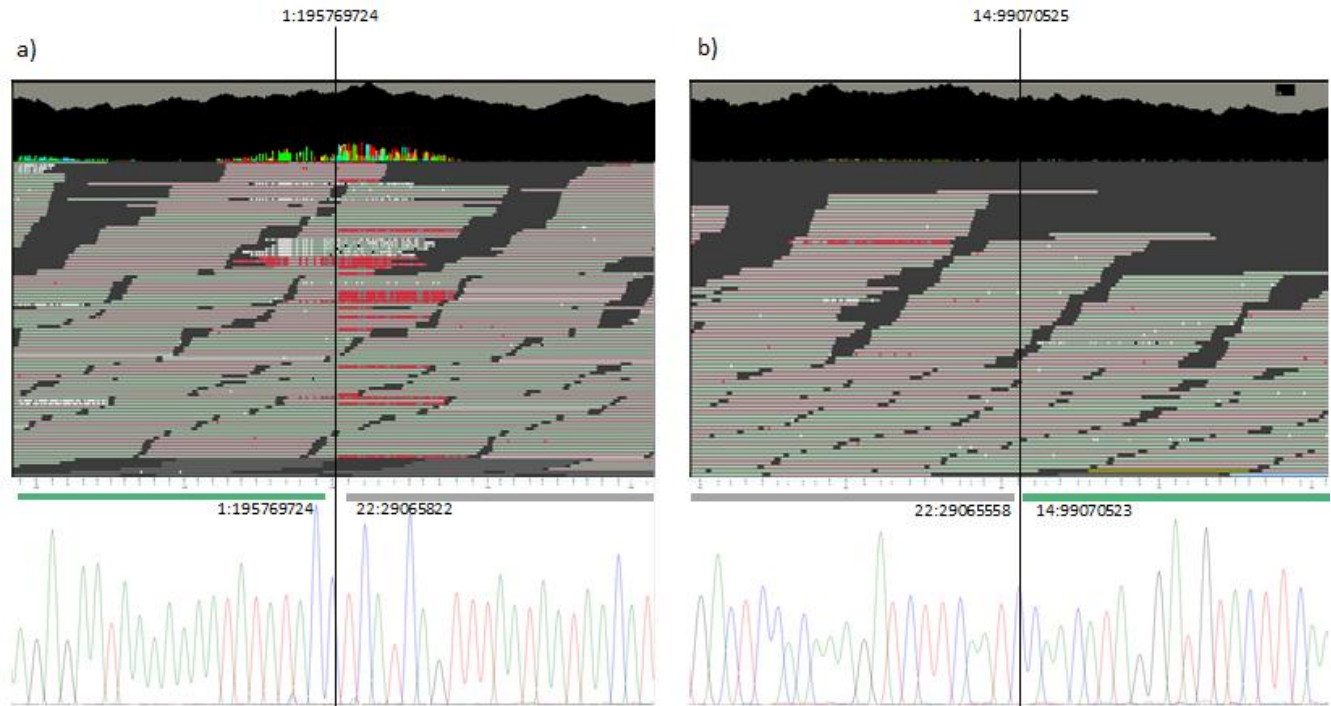

**Supplementary figure S2:** Example of one of the WGS-detected insertions (a) and one of the subclonal insertions not detected by WGS (b). Screenshots from BasePlayer<sup>2</sup> of the WGS data (top panels) show paired-end reads at the exact insertion breakpoint predicted by LDI-PCR/Nanopore and confirmed by Sanger sequencing. In the lower section of the figure; electropherograms of the junctions between the insertion and the target produced from allele-specific PCR and Sanger sequencing. a) Paired-end discordant reads aligning to the unique sequence of L1 *TTC28* can be observed in grey; also split reads encompassing the insertion breakpoint and the polyA. b) By WGS, only one discordant read aligning to 22:29065658 was observed, but no split reads encompassing the insertion breakpoint or a polyA/T were present (= not enough evidence to call an insertion).

Annotations used in FASTA sequences below:

Chromosome 22 (3' transduction)

Chromosome 7 (Target)

Restriction enzyme cut site

Point of inversion

Microhomology

Primer binding site

a) Consensus sequence of LDI-PCR product from *NsiI* digested template, amplified by primer pair 1 on c985T tumor sample. Target location identified as chr4:93280475 (*GRID2*)

```
gtgtataacttcgttcagttacgtattgctaagggttaaaggattcattccacggtaacaccagcacctcccaaaa  
tataccaataactggcaaaaaatgttattattaactgatgaaaaaaaaataaaaaaaaaaaaaaaaaataaaaaa  
aaaaaaaaagtaatagcatgaaactagttttggagtcatacagtcctaagagttaattctagctccatactgaa  
atgattgcatgaatgttggcaagttacttatctgacctataacttttcatctgttaatcagataattagatataa  
ttatagggctgagtttaaggatgtaattcacaggaaaaagccagcacaaatgcacaggaaaagccagcacaaatg  
cctggcagtttgcatttactaaactatgtgttatgcttactctttctccatcttacagaggtttgtgcatttca  
atagagcatagccctcaacactagggaaatgcatacttttttttgcattatgtacttgcattatcaactaatt  
gcaatttcatgttttttttgaacaatagtaacatacgtctaaatacacagaaagccttacataggcaacatttt  
tctgtatggaaaacaatgaatagagtcctttaaagtgtgtaacaaatattgtagttaaatttttttagtagagg  
aaagctgatatcctgtttgggtggccttaactaactaccaaatttttaagtagtgaagtttttgttctttgttct  
tcttttcaagattttatggctcctcttctcagtactaccaacatgtagtggttctcatgtgacttctattctt  
tctcttaccaagcatgcttcttcatctaatgatcagttggaaagcttaggaccactgtgatcaaagattgaaa  
aataactttataaagtaatagcatgttaagttacttataatccaatttaaagtgaagttcaaataccttaacat  
gttcacattacttttaattccacaaaaacgttcttatctatctttattttaagatgttttccacatacatgtagt  
gaaaagtgctgcttgtccatcgggttttgtgtaacctttaacctgtatgcgtgactgt
```

(i) After Human BLAT Search (<https://genome.ucsc.edu/cgi-bin/hgBlat>)

```
chr22:29065832-29065893 polyA chr4:93280454-93280795atgcatchr4:93280043-  
93280482chr22:29065650-29065782
```

(ii) Reconstructing the LDI-PCR product for depiction of the insert before *NsiI* digestion and T4 ligation

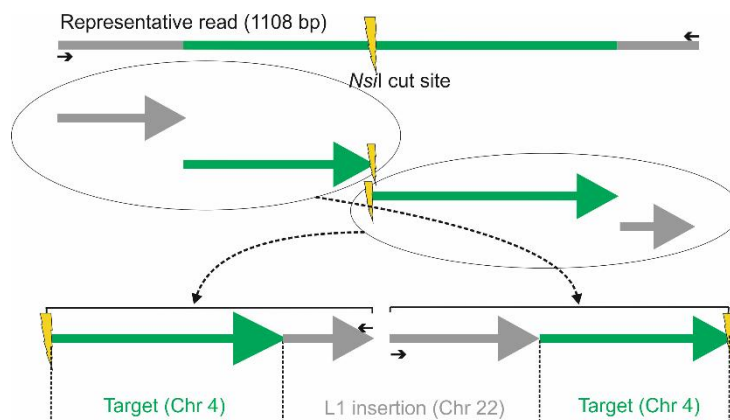



atgcatchr4:93280043-93280482chr22:29065650-29065782 (Primer gap)  
 chr22:29065832-29065893 polyA chr4:93280469-93280795atgcat

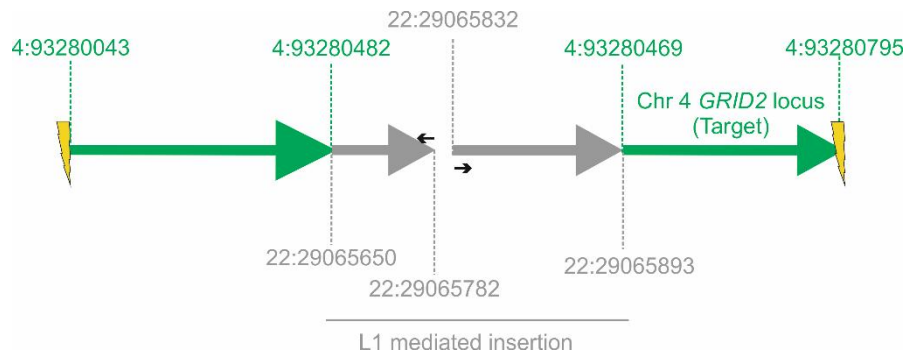

Target site duplication= 13 bp

Forward strand insertion

twin priming absent, microhomology present

Insertion= 29065650-29065893

Insertion length= 243

**b) Consensus sequence of LDI-PCR product from *SacI* digested template, amplified by primer pair 1 on c985T tumor sample. Target location identified as chr7: 146783223 (*CNTNAP2*)**

ggaagttacgtattgctaagggttaaagggtgattcattccacacggtaacaccagcacctttcactaagcatgta  
 tgtggaaaacatcttaaaataaagatagataagaattttgtaacatggaaatttctgataggggaagaatattc  
 ccagaagtgtgaccagttagggccaaaataaaagggtacaatttacccaattattatacctaagtaccggccttat  
 taaatatataaacctcaacatcaaattgtactaaaaaatcaggaaactaagctccttagtagagaactgggtcaaag  
 ggaagatctttgtggagtcagcagtttctctgtcctacaattttggcaaaaataatctcataagcacaagaaggtt  
 aatatgtttgcattaaaaaatgttaagttacttataatccaatttaaagtgaagttcaaataatctttaaacatg  
 ttcacattacttttttttaaatgatgatatttttaaggagcattttaatgtgaacgtagtgtgaaatacaaaatc  
 atatttaaataggaagaaagggatatctctgggctcaatgagttttgaaagaggagaggtttgaaagaataaagt  
 agtttacagaaaataaacaataatgaaaacaagaagaaaatagatatagagaagcaaaagtataaaaaatagc  
 aacatttaaaaatttttatctatgctcttttgatacatccacagaaaatatgtttctcttttctttttcttttca  
 taaaatttattttttatttttaatttttttaattacttttgagacagacagatttctctatcaccagaatggag  
 tgcaatggcatgatcatggctcatggcagcccagtttctctggctcagtcaataatcccacctcagcctcctaagt  
 agctgaaacaggcatgcaccaccatagttagctaatatttttaaatattttctgtggagacaggggtctctatgt  
 tgcccagggtggctcaaactcctgggctccagcgattctccaccccagcctccaaatcgctggaattataagca  
 tgaccacctagtctggccatacagaagatacataatcttagacccttctctcatgtaacatgtagcactttctct  
 aactatatcaaaataatgtctgggaacagcaattttaaatcttagtatgggtataattattgtcaaagcaaaaca  
 agatgaaacttcagaaaagtctagtacagagcttcaacgaattcaagtttaagttttacacctgttaccctgata  
 ctttagaaaagttttatgcttgccctctattgtgcttagagagaatggttggtttgtaggaaaatagacactgg  
 taagtgttaactgtatctgaattttgcacacttcaccagtggtctctgggttattatctacatggtggaccttcagt  
 actgaggacctctctccattcaagctgtcttttattaaccgttctctggggcctcaagttcctctgcagcattt  
 attttgagtttaagtattgttccattattgtcttagaaaacgtaagtatcattagatacagtatctcattgtgga  
 ttatgttatcagattctttgcaatgtgtctctttaacaaaaggatattgagtggcagagtggggaggaaaatcac  
 tgaaaaaaagaggacaccgaagagacacatgaattttctttgtctgtttttttaaccagtggtcatccctagc  
 aagatgtgtgtaagtgcattaaaaacatttgtgtgtagcgaagtggtgaatttctctatgcaacatatttaa

```

aagtcattgttgtacctcaatttgcattggctatttggccctataaatattggctcttgtcctaatgacattttct
atctcaactttaatagaatttgcctgtaaaatggatactacagaaacagcattttatcttcttggtaaaat
cattccaccctaaagtgggggggagctctgcctcctgtcagatgagtgcccgcattagattctcataggagcacta
accctactgtgaactgcacatgcaagggatctaggatgaacactcatgagaatctagtgcctgatgatctgaagt
gaacaacttcatcccaaagccaccctcaagcccaacctgtccgtgggaaaaaaattgtctccaaaacactgggc
cctgggtgccagaaaggttgagatcgctgccataggtgatattctctcctagaaccatacactctgggttttaagag
ctaaaaaacatacagacttattctgtaagtgtaaacattttactgtgtgttacctggccaattcttcacagctga
tcattgtatattttaaattctcttcatgtctcatcgttttattagcgtgttcttcccattatgccattctgaaa
tccttttacaagttgtcctctgggtccagtgatctgggtgatacaaaatgattgatagcaataaacatatcatttgc
atctgcaaccctaaatgtcctgtgtgttctctgtagaaattatgtagctaagacacgcacacgaaagctctgtaagt
caaagagtagcgtcgtgtttttccaaataaattttttctttaaaccttgagcctcattgaagcacaacttgaat
ggtagaaaaccagtgggggcatgtcaccaaaagcagtttctaccgcagcttccaagagaacttcattagtggtt
tcaacctgaataactaatcaatggcataaactctaaggaaattttaatatgaatatttttttttttttttttttt
tttaatccagtaataaacctttatcttctcatcagtttaataataaacatttttttgccagtaattgggtatattt
tgggagggtgctggtgttactgtggaatgaatcctttaacctagcaataacgtaactgaacgaagtacaatgt

```

(i) After Human BLAT Search (<https://genome.ucsc.edu/cgi-bin/hgBlat>)

```

chr22:29065782-29065725(-)chr22:29065369-29065721chr7:146783223-146784742
gagctc chr7:146782455-146783241 polyT chr22:29065912-29065832(-)

```

(ii) Reconstructing the LDI-PCR product for depiction of the insert before *SacI* digestion and T4 ligation

```

gagctc chr7:146782455-146783241 polyT chr22:29065912-29065832(-) (Primer
gap) chr22:29065782-29065725(-)chr22:29065369-29065721chr7:146783223-
146784742 gagctc

```

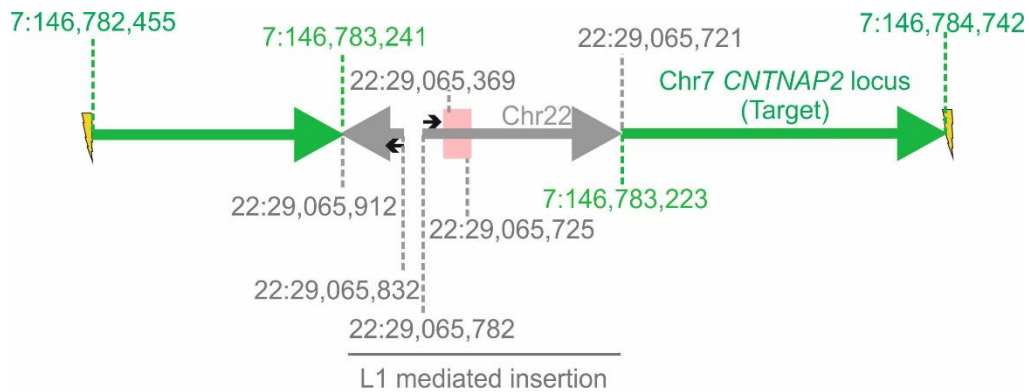

Target site duplication= 17 bp

Reverse strand insertion

twin priming present, microhomology present

deletion due to twin priming = 6 bp

Insertion= 29065369-29065912

Insertion length= 536

**Supplementary figure S3:** *TTC28* LINE-1 mediated 3' transduction at (a) *GRID2* locus and (b) *CNTNAP2* locus in chromosome 4 and 7 respectively detected by LDI-PCR/Nanopore sequencing. For both cases consensus LDI-PCR product read generated by Nanopore sequencing with complete sequence information was used. (i) shows the genomic co-ordinates of the read and all junctions after its alignment with human reference genome hg19 using BLAT (ii) genomic co-ordinates from (i) were reconstructed to remove alteration produced by digestion, self-ligation and inverse PCR is shown along with schematic representation of the insertion.

Annotations used in the FASTA sequence below:

Chromosome 22

Restriction enzyme cut site

Primer binding site

**Consensus sequence of LDI-PCR product from *NsiI* digested template, amplified by primer pair 1 on c985T tumor sample that shows full length *TTC28* L1 at its native location**

```
TTTTCGTTAAAGGATTCATTCACAGGTAACACCAGCACCTGCCAGATCAAGTAATCCTACTCATTTTACCTGTATTACTGAAA
ATAAAAATGGGGGGGCAAATAGGAACCTTTAATATCTTTAATGATGTTTTAAGGTTGAACTTTATTTCTGACATTTTCTACAC
CTCTAATGAAAATACATTTTCACATATCGTAAACTTACCCATTAAGAATCAGTTCAGTGTCTTTTGGTGATTTATTTCAGAGTTT
GCAACCATTACCACAATCTAATTTTAGAATAGTCTCATCACCCATACCCATCAACAGTCATTCCTCCTCCTCCCCACCCAA
GCTTGTTTCAGTGACAAAATAATCTTCTTTCCCTCTCTATGCATTTTTTAACAGCAAAAAAATATTTTCGGAAGTATATCTTTA
TTTCACAAAACCTGGTTCACAAAACCTAAAATTTCTGAATCAAAAACACAACCTTATAGTACCCAACACATTTCTCTTTAACTTTTATT
TGTACTATGAATTGATTTCTTCTCATCAATAACCAAGGAATATACAAAGTAGTGATTTTCTTTATCATTTCTTTTCATCAGCAC
AGTAAAAGGAAATTTTTTCTTTTTTAGAGACGGAGTCGCTCTGTACTTGAAGTGAATGCAGTGGCACCATCTCAATCACTGC
AACCTCTGCCCTCCAGGTTCAAGTGATTTCTTCTGCCTCAGCCTCCCAAGTAGCTGGGACTGCAGCAATTTTACACCACCACA
CCGGCTAATTTTTTTGTTTTTTGTTTTGTTTTGGTTGGTTTTGGTTTTGGTTTTGGTTTTAGGATGGAGTCTCACTCTGTCTC
AGACTGGAGTACAGTGGCGCTATTTTCGGCTCACTGCAGCCTCCACCTCCTGGTTTTCAAGGGATTCTTCTGTCTCAGCCTCCCA
GGTAGCTGATACTGGGCATGTGCCACCACACCCGGCTAATTTTTGTGTTTTTTCAGTAGAGACGGGGTTTTCTATTATTAGCCAGG
CTGGTCTCAGTGTCTGACCTCAGGTGATCCACCACGTTGGCTTCCCAAAGTGTGGGATTACAGGCATGAGCCACCGCGGC
TGGCAATTTTGTATTTTTTAGTAGAGATGGGTTTCACCATATTGGCCAGAATGGTCTCGAACTCCTGACCTCATGATCTGAG
AAAGGAAAAAATTTTAAATATAATTCCTTTATTTCAAATTTGCACTTGGAGGAAATTAGAATCATTTCTTTTGCTATCACCAA
AAACTACTGCTTTTAAAGGCCAGCCGAGTGGCTTACACCTGTAATCCAGCACTTTGGGAGGCCAGGGTGGAGCGGATCACCTG
AGGTCAGGAGTTTCGAGACCAGCCTGACCAACATGGAAACCCCGTCTCTACTAAAAATACAAAATTAGCCGTGTGTGGTGGCTG
CCTGTAATCCCAACTACCCAGAGCTAAGGCAGGAGAATCCCTTGAACGAACCCAGGAGGTGGAGGTTGCGGTAGTTCGAGATCA
TTTTCGTGTACTCCAGCCTGGGCAACAGAGTACAGCTCCATCTCAGAAAAAACAATTTGTGTATATAGCCTCATTCCT
TATAATCCCTTCTTCATTTATTTAGTTTCATCATCCAAGAAACATTTATATCCAGGTAATTAAGTATTGGTTAATAACAG
CTTTATAACATTCATTTTATTCATTTATTTTTGAGACTGGGTTTCATTTCTGTGGCCAGAGCTACAGTCTGTCTTATAGCTC
ACTGTAATTTGGAACACTGGGTTCAAGGGTCTTCTGCCTCAGCCTCCTGAGTAGCTGGGACTACAGGTACATGCCACCATA
CCCGGCCATTTGACTGATTGATAGACAGATGGTTTTTGTTTTTTTTTTTTTTTTGGAGACCAGAGTCTCACTCTGTCCACCAGGCTCAG
GTGCAGTGGCACGATCTCATCACTGCAACCTCTGCCTCCAGGTTCAAGCAATTTATCCTACCTCAGCTTCCCAAGTAGCTGGG
ATTACAAGGAGCATCACACACCAGCTAATTTTGTATTTTAGTGGAGATGGGGGTCTCACCATGTTAGCAAAAGCTGGTCT
CGAACTCCTGACCTCAGGTGATCCACCTGCCTCAGCCTCCCAAAGTTCTGGGATTACAGGCATGAGCCACTGCACCTAGCTAA
AAAAATATATTTTAGAGACTGGGTTCTCACACTATGTCACCCAGAGTAGTCTTGAAGTCCCTGACCTCAAGCAATCCTCCTACTT
CAGCTACCAATAGCTGAAATACAGAAAGAACAACCATGCCTGGCTCAGTTTTTGTAACTTTCAATACATAAAAAATTCACACTGC
```

TCACATTGTAATTAATTTTCATCTTTTCATTAAATTAATAGATAATAAAATTTGATAATAAACTTAATGTCAAATGCTGCTTCAG  
TCAGTATTATAGAGATAAATTCAGAATGGTGTGCCAACATAACCTTAAACTCACAATAAAAACTGGGTTTTAAACAATATCCAC  
AGGAAATTAATGTTATTTCTGGCAACAAGTCTAACGTTGGTAGCAAAAAAGGTAGTTATAATTGATCACTATTTGTAGTGAT  
CCATACAAAATCAAAGACAGTCTAAGGCAAAATGGTTAGAACAGATTGAGAATGACTGCTAAAAATTAGAATCAAGGCAATTCAGT  
TTCCCTAGCTGGATGGTATTGATAAAAGTTACTTAACTCTCATACTACACTTGTCTCCATATGTAAGATGGGGATAATGACCT  
ACTTCTTAAGTTGTGAAATTAAGAATTAGTTAATATATGTAAAGAGTATTTAAACGAAGTACTGACACAGAGTACACACAATA  
TAAATGTAGTCTAGCTATAATCTAAACACCTATATACTTACACAGAAGGGAAAGGTGCTTTCCACGATACTCTATAATTTATA  
TGGTCTTCCAAAATAAGCCTAATGAAAATTTTATTTTTCATAAAATATATTTGGAATTTGTAGCCTAGCCAGACAATTTATA  
TTAAATGGTTTTCATAAATCTTTGTGAATATTAAGGAAGCAATGGATTCAACAAAAGCATTTAATGAGCGGTGGGCAATATTC  
AAAACTCCTGTTGCTACACAAGCCAAAAAAAACAGACAGGGATCAAGACAACCTCAAAAACAAAATATTACACACAGAACAGGAAA  
CAACTGTACAGTATCAGGAAATGCAATACACTTTTTCTAGTGATAAGAACTTCCACCGGGCGCAGAGTGGCTCACACCTGTA  
ATCTGGGAGGCTGAGGCAGGCTGATCTCGAGGTCAGGAGTCAAGGACCATCTGGCTAACACAGTGAAACCCATCTGTACTA  
AAATACAATAAATTAGCCAGGCGTGGTGGCGAACGCTGTCCAGTACTCGGAGTGAGATGGGAGAATGGCGTGAACCAGGA  
GGCAGAGATTGCAGTGAGCCGAGATAGTGCCGCTGCACTCCAGCTGGGAGACAGAGCGAACTCCGTCTCAAAAAAAAAAAAA  
AAGAAAAGAAGAAGAAAAAGAGAGGGAGGAGCCAGATGGCCGAATAGGAACAGCTCGGTCTACAGCTCTAGCAGTAGGCAGGCA  
CAAGAGACTTGGGTGATTTCTGCATTTCCATCTGAATGAGGTGCCGGGTTTCTACTAGGGAGTGCCAGACGGTGGGCGCA  
GGCCAGTGTGTGTGCACCGTGCAGGCAAAAGCAGGGCGAGGCATTGCCCTCGGGAAGCGCAAAGGGGTCCAGAGTTCCTTTT  
CCGGGAGTCAAAAAGAAAGGGGTGACGGACGCACCTGGGAAAATCAGGTCCTCCACGCGAATGTGCGCTTTTCAGACCGGCAGA  
AACGGCACACGAGACATATCCACACCTGGCTCAGAGGGTCTACGCCCGAATCTCGTGATTGCTAGCACAGCAGTCTGA  
GATCAAACTGCAAGGCGGCAGCCAGGCTGGGAGGGGCGCCCCGCGTGCAGGCTTGCTTAGATGGCTCAAAGCAGCCGGGAAG  
CTCCAACCTGGAGTGGAGCCACCACAGCTCAAGGAGGCTGCCTGCCTGTAGGCTCTCCACCTCACGGAGACAGGGCACAGAC  
AAACAAAAGACAGCAGTAACCTCTGCAGACTTAAGTGTCCCTGTACAGACAGCTTTGAAGAGAGCAGTGGTTCTCCAGCAC  
GCAGCTGGAATCTGAGAACAGGCAGACTGCCTCCTCAAGTGGGTCCCTGACCCCTGACCCCGAGCAGCCTAACTGGGAGG  
CACCCCCAGCACAGGGGCACACTGACACCTCACACGGCCAGGGTATTTCAACAGACCTGCAGCTGAGGGTCTGTCAATTAGA  
AGAAAATAACAACCAAGAAAGGACATCTACACGAAAACCCATCTGTACATCACCATCATCAAGACCAAGTAGATAAAAACAC  
AAAGATGGAAAAAAACAGAACAGAAAATGGAACCTTAAAACGCAGAGCTCTCCTCCTCCAAGGAACGCAGTTCTCACC  
GCAACAGAACAAAAGCTGGGTGGAGAATGATTTTGACAGGCTGAGAGAAAGGCTGAACGATCGATTATACTCCTGACTGCAGGGA  
GGACATTTCAAAACAAAAGACAAAAGAAATGAAAACTTTGAAAAAATTTAGAAAGAAATGTATAACTGGAATAACCAGCTGAAAAGT  
CTTAAAGGGGTGAGTGGAGCTGAAAAACCAAGGCTCGAGAACTACGTGAAGAATGAAGCCTCAGGACCGATGCGATCAACTGG  
AAAAGATATCAACAATGGAAGATGGAATGAATGAAATGAAGCGAAGAAGGGAAGTTTACAGAGAGAAAAAGGAATAAAAAAGA  
AATGAGCAAAGCTCTCCAAGAAATATGGGACTATGTGAAAAGACCAAATCTGCATCTGATTGGTGCCTGAAAAGTGATGTGGA  
GAATGGAACCAAGTTGAAAACATACAGGATATTTATCAAGGAGGAGAACTGTCTAGCAAAGGCGAATAACGTTTCAAGATTCAAGG  
GGAAATTAACAGAGAACACTACAAAAGATACTCCTCGAGAAAGAGCAACTCAAGACACATAAATGTTCAAGATTCAACAAAAGTTGGA  
AATGAAGGAAAAAATGTTAAGGAGCAGCCAGAGAAAAGGTCAGGTTACCCTCAAAGGAAAAGCCATCAGACTAACAGCGGATC  
TCTCAGCAGAAACCTACAAGCCAGAAGAGAGTGGGGCCAATATTCAGCATCTTTAAGAAAAGAATTTTCAACCCAGAATTTCA  
TATCCAGCAAATAAATACTACATAAGTGTGAAGGAGAAAATAAAATACTTTATAGACAAGCAAATGCTGAGAGATTTTGTACCA  
CCAGGCTTGCCTTAAAAAATAAATACTTGAAGAAGCTAAACATGGAAGGAGTGGCAGTACCAACTAGCTGCAAAATCTGTATGC  
CAAAATGCAAGACCATCGAGACTAGGAAGAACTGCATCAACTAATGAGCAAATCACCAGCTAACATCTATTGTGGATCAAAT  
TCACACATAACAATATTAACCTTTAAGCTAAAATGGACTAAAATTTGCAATTTAAAAGACACAGACTGGCAAGTTGGATGAAGTCA  
AGACCCATCAGTGTCTTTGATTTAGAAAACCATCACGTGCAGAGACACACATAGGCTCAAATAAAAGGATGGAGGAAAGATCTG  
CAAGCCAATGGAAGCAAAAAAAGGCAGGAAGTTGCAATCCTAGTCTCTGTATAAAACAGACTTTTAAACCAGCAAAAAAGATCAA  
AAGAGAGACAAAGAGGCCATTTACATAATGGTAAAAGGGATCAATTTCAACAAGAGAATAACTATCCTAAAATATTTATGCACCC  
AATACAGGAGCACCAATTTATAAGCAAGTCTCTCAGTGACCTACAAAGAGACTTAGACTCCACATTTATGTGGGAGACTTT  
AACACTACCTGTCAACGTGGGCAGATCCAGCAGACAGAAAAGTCAATGAGATGCCAGAAATGAACTCAGCTCTGCCAAGCAGA  
CCTAATAGTATCTAGAACTCTCCACCCCAAATCCAGCAAAAATATACATTTTTTTCAGCACCACGCCACACCTATTCCAAAAATG  
ACCACATGGTTGGAAGTAAAAGCTCTCCTCAGCAAAATGTAAGAAAAGAACAGAAATTTATAAACTATCTCTCAGACCTGAGTGCAA  
TCAAGCTAGACTCAGGATTAAGTCTCACTCAAAGCCGCTCAGCTTTCATGAAAATGAACAGCCTGCTCTGAATGACTGCTGGG  
TACATAGCAGAAATGAAGGCAGAAATAAAGGTGTTCTTTGAAACCAGCGAGAACAAGACACCACATGCAGAATCTCTGGGACG  
CATTTCCAGAAGCAGTGTGTAGGGGAAATTTGCTAGCACTAAGTACTTGCACCACAAGAGAAAGCTGAGGAAAGTCAAAGTGAC  
CCTAATCTGAATTTAAAAGAACTAGAAAAAGCAAAGGCAAAACACATTTCAAAGCTAGCAGAGGCAAGAAATAGCTAAAATCAGAG

CCAAATGAAACTAGAATTTGCAAAAAACCCCTTCAAAAAATCAATGAATCCAGGAGCTGGTTTGAAAGTCAACAAAAATGATG  
GGCCATGTAGAGGACTAATAAAAAGAAAAAGAGAAGAAATCAAATAGACACATTTAAAATGATAAAGGGGGAGGTTATCACCACCA  
GTCCACAGAAGCCAAACTGCATCAGAGAATACTACCAAACACTCTACACCAAAATAAACTAGAAAACTAGAAAGAAATGGAATA  
CATTCTCAACATACATCTCTCCCAAGACTAAACCAGGGGAGAGGGCAGATCTCTGAATATAGACCAATAACAGGCTCTGAAA  
TTGTGGCAATGATGTGGTTACCAACCAAAAAGAAATTCAGGACAGATGGATTACACTGCAAGGTCTACCAGAGAGGTACAAGGAG  
GAACTGGTACCATTTCATTACAAAACCTATTCATCAATCAATAGAAAAGAGAATCCTCCTAACTCATTTTTTTTATGAGGCCAAGCATC  
ATCTGATACCAAAGCCGGGTAGAGACACAACCAAAAAGAGAATTTGGAGCCAATATCCTTGATGAACATTGACGCAAAATCAT  
AAGCCAAATACTGGCAAACAGATCCAGCCTTTTTTTTATCAAAAAAGCATCCACCATGATCAGTAGACTATTTCTGGGATGC  
AAGGCTGAGTTCAACTCACAAATCAATAAATGTAATCCAGCATATAAACAGAGCCAAAGACAAAAAACCACTGATTATCTCAA  
TAGATGCAGAAAAAACCTTTGACAAAAAGATTCAAAGCAACCCTTTAATATGAAGCTTCTCAATAGAATTTGGGTATTGATGGGA  
CGTATTTTCAAATAACAGAGCTATCTATGATGACAAAACCTACAGCCAATATCATACTGAAAATGGTAAAACTGGAAAGCATTCTTTT  
GAAAACTGGCACAGACAGGGATGCCATATCTCACCGCTCTATTCACATAGTGTGGAAGTTCTGGCCAGGGCAATCAAGGCAGG  
AAGGAAATAAAAAGGTATTCATTTGAAAAGAGGAGAGGTCAAATTTGTCTGTTTTAGACATGATTGTTTTATCTAGAAAAG  
ACCCCATCGTCTCATTGAAATATAGCCAAGCTGATAAGCAACTTCAGCAAAGTCTCAGGATACAAAATCAATGTACAAAAATC  
ACAAAAGCATTCTTATACACCAACAACAGACAAAAGACAGAGAGCCAAATCATGGGTGAACTCCATTTACAGGTAGCTGAAGAC  
CAAATACCTGGGAATCCAACACAAGGAATTTCTGGGACTCTTCAAAGGGAGAACTACAAAAACCACTGCTCAAGGAAATAAAGA  
GAGGACACAAAACAAATGAAAAGAACATTTCCATGCTCATGGGTAGGAAGAAATCCAATATCGTGAAAATGGCCATACTGCCGAG  
GTAATTTACAGATTCATGCCATCCATCTATCAAGCTACCAATGACTTTCTTCTGGGGTGAAAAACTACTTTAGAAAAGTTTCA  
TATGGAACCAAAAAGGCCCGCATTTGCCAAGGTGTCCCTAGAAAACCAAAGAACAAGCTGGAAGCATCCACACTGCCTGACTT  
CCAAACTATACTACAAGGTACAATGCCAAAACAGCATGGTACTGGGCACCCAAAACAGAGATATAGATCAATGGGAACTAGA  
CAGGCTCCAGAAAATAATGCCCATATCTACAGCCTCTGATCTTTGATATGGAAGCCTAGAAGAAAACAAGCAATGGGGGAAAAGG  
ATTCCCTATTTAATAAATGGTGCTGGGAAAACTGGCTAGCCATGTAGAAAAGCTGAAGCGGATCCAGCAACACCTTATGCAAAA  
ATCAAATTCAGATGGATTAAAGATTTAAACGATTAAACCTAAAAACCATAAAAACCTTAGAAGAAAACTAGAGCATTACCATT  
CAGGACATAGGCATGGGCAAGGACTTCCATGTCCAAAACACCAAAAAGCAATGGCAACAAAACCAAGAATTGACAAATGGGACT  
AATTCAAACCTAAAAGGCTTCTGCACAGCAAAAAGAAAAGAACTACCATCAGAGTGAACAGGCAACCTACAACATGGGAGAAA  
ATTTACCATGACCTACTCTCATCTGACAAAAGGGCTAATGTCCAGAATCTACAATGAGCTCAAAAACAAATTTACAAGAAAAAC  
AAAACAATAATAAAAAGTGGGCGAGGACATGATGTAAGACACTTCTCAAAAAGAAACACATGCAGCCAAAAAAAACATGAAGAAA  
TGCTCATCATCACTATTGTTACATCAGAGAAAATGCAAAATCAAAAACCGCATGAGATGTCATCACACCAGTTAGTGGCAATCATT  
AAAGTCAGGAAACCAGCAGGTGCTGGAAGGGATGCGGAGAAAATAGGAACACTTTTTTTTACACTGTTGGTGGGACTGTAAACTAG  
TTCAAACCATTTGTGGAAGTCAGTGGTGATTCCTCAGGGATCTAGAACTAGAAAATACCAACAGGCCACCCATCCCTACTGG  
GTATATACCCAAATGAGTATAAATCAATGTAATATAAAGACACACATGCACACGTATGTTTATTTGCGGCACTATTTCTATG  
TAAGACTTAAGAAATAGCCAGAAAATGTCAACAATGATGACGGATTAGAAAATGTGGCTGCCACACCATTAAGAATACTATACAG  
CCATAAAATGATGAGTTCCATATCTTTGTAGGGACATTGGATAGAAAATTTGAAAACCATCAAATTTCTCAGAAAATATCACAAGA  
ACAAAAAAAATAACACCGCATATTTCTCACTCATAGGTGGAAATTTGGAGGGGCAATGAATCACATGGACTGGGAAGGGGAACTCA  
CACTCAGGGACTGTGGTGGGGAGTAGGAGGAGGGGGGAGGACAGTGGAGATATACTTAATGCTAGATGACACGTGATTACAGC  
ACCAGCATAGCATGTAGCCACATATGTAACCTGCACAATGTGCACATGTACCCTAAAACCTTAGGTATAATAAAAAAAAAAAAAA  
GAAAGAAAAAAAAAGCTTCACATGGGGCCACATGTCTAATAAAGAGTGAATCCAAAACCTCTTAGTGGCGCAAAATTC  
CTGATAGGGGAAGAAATATTTCCAGAAAGTGTCTGACCAGTTAGACCAAAATAAAAAGTACAAATTTACCCAATTAGTATACCCT  
AGTACTGACCTTATTAATAATATATGTTCTCAATACAAATTTGACTAAAATCCAGGAAAACCTAAGCTCCTAGTAGAGAACTGGGT  
CAAGGAAGATCTTTGTAGGTCCGGCAGTTTTTCTCTGTCTGAATTTGGCAAAAATAATCTCTGTAAAAGCACAAAGAGGTTAA  
TAATAGCACATTTAAAATGTTAAGTTACTTTGTCAATTTAAAATATGAGTTCAAATATAGCATGTTCTGATACTTTTTTATTCAAAA  
ACGTTCTTATCTATCTTTGTACACAGATGTTTTCCACATACATACTTAGTAGATTTTCTTTTGGAGATATGAAGGTCTACAAA  
TCTTTATTTACTATTTCCCAAAAATATACCCAAATTTACTGGCAAAAAAATATTTATTTAACTGATGAAAATATAAAG  
GTTTATTTACTGGGATAAATAAGTTTTCCATATGCTTGAATTTTTTTTATACACACAGTATATACTCTATTATATGTATACACAG  
AATACAACCTCTATCATTGAACTTTGGTTTTGTCATTCCAT

chr22:29066035-29066380 atgcat chr22:29056087-29065692 (4bp gap) chr22:29065696-29066018

atgcat chr22:29056087-29065692 (4bp gap) chr22:29065696-29066018 (Primer gap)

chr22:29066035-29066380 atgcat

**Supplementary figure S4:** Consensus sequence analysis of the native LDI-PCR product containing full length *TTC28 L1*.

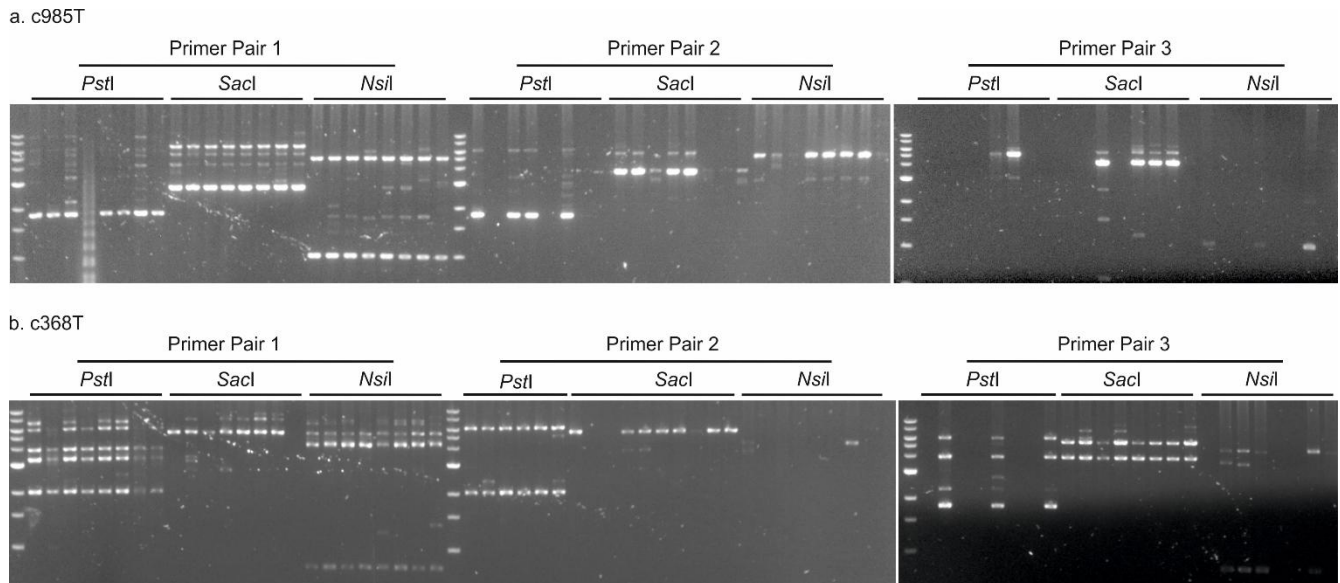

**Supplementary figure S5.** LDI-PCR on two colorectal tumor DNA (c985T and c368T) digested with three different enzymes (*Pst*I, *Sac*I and *Nsi*I) using three different inverse primer pairs (8 replicates for each case) gave - a native product of known size and tumor specific products of different sizes representing various putative 3' transduction targets. All the replicates of each reaction that showed uniform PCR product band pattern in the agarose gel were pooled and processed for Nanopore sequencing. The replicates that did not show uniform PCR product were repeated ('M' denotes 1 kb ladder (NEB) and reaction without any template was run on '-' lane as control)

## References:

- 1 Tabaska, J. E. & Zhang, M. Q. Detection of polyadenylation signals in human DNA sequences. *Gene* **231**, 77-86 (1999).
- 2 Katainen, R. *et al.* BasePlayer: Versatile Analysis Software For Large-Scale Genomic Variant Discovery. *bioRxiv*, doi:10.1101/126482 (2017).
